# Supplementary material
Source: PubMed Central journal article supplement (PMC7092396)
Supplement: Supplementary_Tables.pdf [file Supplementary_Tables.pdf]

**Supplementary Table 1.** CHOP-Medical Trainee study sites.

| <b>Site</b>                                                                            | <b>Frequency</b> | <b>Percent</b> | <b>Cumulative Percent</b> |
|----------------------------------------------------------------------------------------|------------------|----------------|---------------------------|
| Tulane University School of Medicine, New Orleans, Louisiana                           | 2,131            | 42.06          | 42.06                     |
| Texas College of Osteopathic Medicine, Fort Worth, Texas                               | 276              | 5.45           | 47.50                     |
| Texas Christian University School of Medicine, Fort Worth, Texas                       | 60               | 1.18           | 48.69                     |
| University of Illinois at Chicago School of Medicine, Chicago, Illinois                | 61               | 1.20           | 49.89                     |
| University of Colorado School of Medicine, Denver, Colorado                            | 161              | 3.18           | 53.07                     |
| Western Michigan University Homer Stryker M.D. School of Medicine, Kalamazoo, Michigan | 3                | 0.06           | 53.13                     |
| University of Texas Health Science Center at San Antonio, San Antonio, Texas           | 211              | 4.16           | 57.29                     |
| Lake Erie College of Osteopathic Medicine, Erie, Pennsylvania                          | 229              | 4.52           | 61.81                     |
| Rutgers New Jersey Medical School, Newark, New Jersey                                  | 647              | 12.77          | 74.58                     |
| Meharry Medical College School of Medicine, Nashville, Tennessee                       | 269              | 5.31           | 79.89                     |
| University of Chicago Pritzker School of Medicine, Chicago, Illinois                   | 99               | 1.95           | 81.84                     |
| Michigan State College of Human Medicine, East Lansing, Michigan                       | 20               | 0.39           | 82.24                     |
| Mercer University School of Medicine, Macon, Georgia                                   | 1                | 0.02           | 82.26                     |
| West Virginia University School of Medicine, Morgantown, West Virginia                 | 71               | 1.40           | 83.66                     |
| University of Alabama School of Medicine, Tuscaloosa, Alabama                          | 10               | 0.20           | 83.86                     |
| University of Tennessee College of Medicine, Memphis                                   | 96               | 1.89           | 85.75                     |
| A.T. Still University School of Osteopathic School of Medicine, Kirksville, Missouri   | 20               | 0.39           | 86.15                     |
| University of Utah School of Medicine, Salt Lake City, Utah                            | 142              | 2.80           | 99.95                     |
| University of South Carolina School of Medicine, Columbia, South Carolina              | 1                | 0.02           | 88.97                     |
| University of Texas School of Medicine, Houston, Texas                                 | 93               | 1.84           | 90.80                     |
| Swedish Family Medicine Residency – Cherry Hill, Seattle, Washington                   | 18               | 0.36           | 91.16                     |
| Northwest Arkansas Community College, Bentonville, Arkansas                            | 3                | 0.06           | 91.22                     |
| Mississippi Gulf Coast Community College, Biloxi, Mississippi                          | 292              | 5.76           | 96.98                     |
| Church Health Center, Memphis, Tennessee                                               | 13               | 0.26           | 97.24                     |
| Duke University School of Medicine, Durham, North Carolina                             | 1                | 0.02           | 97.26                     |
| Ohio State University School of Medicine, Columbus, Ohio                               | 3                | 0.06           | 97.32                     |
| Weil-Cornell Medical College, New York City, New York                                  | 10               | 0.20           | 97.51                     |
| Open Door Family Medicine, Ossining, New York                                          | 2                | 0.04           | 97.55                     |
| University of Central Florida College of Medicine, Orlando, Florida                    | 1                | 0.02           | 97.57                     |
| University of Florida College of Medicine, Gainesville, Florida                        | 1                | 0.02           | 97.59                     |
| University of South Carolina School of Medicine, Greenville, South Carolina            | 3                | 0.06           | 97.65                     |
| Spectrum Health System, Grand Rapids, Michigan                                         | 119              | 2.35           | 100.00                    |

**Supplementary Table 2.** Assessment of Mediterranean diet adherence

| <b>Mediterranean Diet Category</b>                                                 | <b>Serving Requirement</b>                                                     | <b>0</b> | <b>+1</b> |
|------------------------------------------------------------------------------------|--------------------------------------------------------------------------------|----------|-----------|
| Vegetables (e.g. carrots, spinach, tomatoes).                                      | 4 or more servings per-day                                                     |          |           |
| Legumes (e.g. beans, split peas, or lentils)                                       | 1 or more servings per week                                                    |          |           |
| Fruits (e.g. oranges, apples, bananas)                                             | 3 or more servings per week                                                    |          |           |
| Nuts, seeds, or nut butters (e.g. peanuts, almonds, cashews)                       | 1 or more servings per week                                                    |          |           |
| Red and processed meat (e.g. hamburgers, steak, hotdogs)                           | Less than 2 servings per week for women, less than 3 servings per week for men |          |           |
| Non-fried fish or seafood (e.g. canned, baked, grilled)                            | 2 or more servings per week                                                    |          |           |
| Whole grains<br>(e.g. whole wheat bread or pasta, oats, brown rice, corn tortilla) | 1 or more servings per day                                                     |          |           |
| Monounsaturated fats (e.g. avocado, olive or canola oils)                          | Higher reported intake of unsaturated fats versus saturated fats               |          |           |
| Alcohol                                                                            | (1/2 to 1 drink per day for women, 1-2 drinks per day for men)                 |          |           |

**Supplementary Table 3.** Assessment of nutritional attitudes and core lifestyle medicine counseling competencies

| <b>Attitudes</b>                                                                                                | Not at all confident or Somewhat confident | Neither not at all confident, or totally confident | Mostly confident to totally confident |
|-----------------------------------------------------------------------------------------------------------------|--------------------------------------------|----------------------------------------------------|---------------------------------------|
| Nutritional counseling should be included in any routine appointment, just like diagnosis and treatment.        |                                            |                                                    |                                       |
| Specific advice about how to make dietary changes could help patients improve their eating habits.              |                                            |                                                    |                                       |
| Physicians can have an effect on a patient’s dietary behavior if they take the time to discuss the problem. (5) |                                            |                                                    |                                       |
| <b>Lifestyle Medicine Counseling</b>                                                                            |                                            |                                                    |                                       |
| Mediterranean Diet and its health effects.                                                                      |                                            |                                                    |                                       |
| DASH diet and its health effects.                                                                               |                                            |                                                    |                                       |
| Vegetarian diet and its health effects                                                                          |                                            |                                                    |                                       |
| Very low-fat diet and its health effects.                                                                       |                                            |                                                    |                                       |
| High protein/high fat diet (e.g. Atkins) and its health effects.                                                |                                            |                                                    |                                       |
| Examples of a serving size from the 2011 “My Plate” guidelines.                                                 |                                            |                                                    |                                       |
| Definition of moderate alcohol consumption and its health effects.                                              |                                            |                                                    |                                       |
| Recognizing warning signs and symptoms of patients with eating disorders.                                       |                                            |                                                    |                                       |

|                                                                                        |  |
|----------------------------------------------------------------------------------------|--|
| Role of dietary cholesterol and saturated fat in blood lipids.                         |  |
| Recommended dietary patterns for type 2 diabetes.                                      |  |
| Significance of modest weight loss for type 2 diabetes.                                |  |
| Weight loss strategies in overweight or obese patients.                                |  |
| Role of Omega-3 and -6 fatty acids in heart health and their food examples.            |  |
| Role of dietary fat types (e.g. saturated vs. other) and their food examples.          |  |
| Identifying antioxidant-rich grocery produce.                                          |  |
| Calories per gram of protein, carbohydrate and fat, and their basic metabolic roles.   |  |
| Role of hydration in health, and fluid needs based on activity and age.                |  |
| Celiac disease and management strategies for patient's diet and lifestyle.             |  |
| Food allergies and management strategies for patient's diet and lifestyle.             |  |
| The role of glycemic index and load in dietary management.                             |  |
| Fiber in disease prevention, and example ingredients.                                  |  |
| Assessing the total calories, saturated fat, and sodium using the food label.          |  |
| Osteoporosis and prevention and treatment strategies for patient's diet and lifestyle. |  |
| Calculation of body mass index (BMI) and waist-to-hip ratio based on gender.           |  |
| Overall benefits of aerobic exercise on health and well-being.                         |  |



**Supplemental Table 4. Dietary habits over the last 6 months**

|                                                                                             | Once per month /<br>Never | 1-2 times<br>per week | 3-5 times<br>per week | 7 times per<br>week (daily) | 2 or more<br>times daily |
|---------------------------------------------------------------------------------------------|---------------------------|-----------------------|-----------------------|-----------------------------|--------------------------|
| Vegetables<br>(e.g. carrots, spinach, tomatoes)                                             |                           |                       |                       |                             |                          |
| Legumes<br>(e.g. beans, split peas, or lentils)                                             |                           |                       |                       |                             |                          |
| Fruits<br>(e.g. oranges, apples, bananas)                                                   |                           |                       |                       |                             |                          |
| Nuts or nut butters<br>(e.g. peanuts, almonds, cashews)                                     |                           |                       |                       |                             |                          |
| Cheese or fermented dairy<br>(e.g. yogurt)                                                  |                           |                       |                       |                             |                          |
| Red and processed meat<br>(e.g. hamburgers, steak, hotdogs)                                 |                           |                       |                       |                             |                          |
| Non-fried fish or seafood<br>(e.g. canned, baked, grilled)                                  |                           |                       |                       |                             |                          |
| Whole grains<br>(e.g. whole wheat bread or pasta, oats,<br>brown rice, corn tortilla)       |                           |                       |                       |                             |                          |
| Monounsaturated fats<br>(e.g. olive oil, avocado, canola oil).                              |                           |                       |                       |                             |                          |
| 1 alcohol serving<br>(1 can of 12 oz. beer = 1 glass of wine = 1<br>shot of spirits)        |                           |                       |                       |                             |                          |
| Baked products<br>(e.g. muffins, doughnuts, pastries)                                       |                           |                       |                       |                             |                          |
| Calorie-containing beverages<br>(e.g. coke/soda, non-black coffee drinks,<br>energy drinks) |                           |                       |                       |                             |                          |
| Saturated fats<br>(e.g. butter, 2% or whole milk, margarine)                                |                           |                       |                       |                             |                          |
